# Supplementary material
Source: Springer Nature journal article supplement (https://www.springermedizin.de/resource/supplementary/13054_2009_8419_MOESM3_ESM.pdf/9731926)

PaO<sub>2</sub> (mmHg)

**Control group**

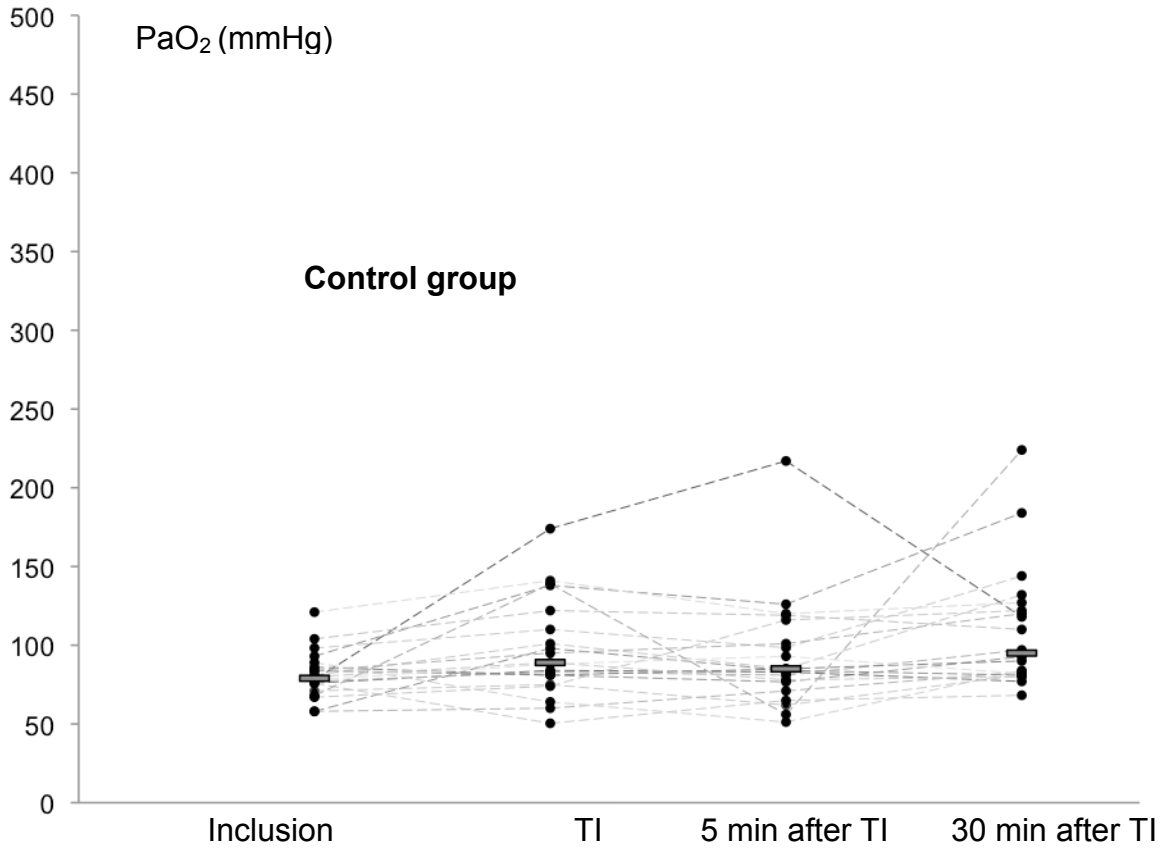

PaO<sub>2</sub> (mmHg)

**Recruitment Maneuver group**

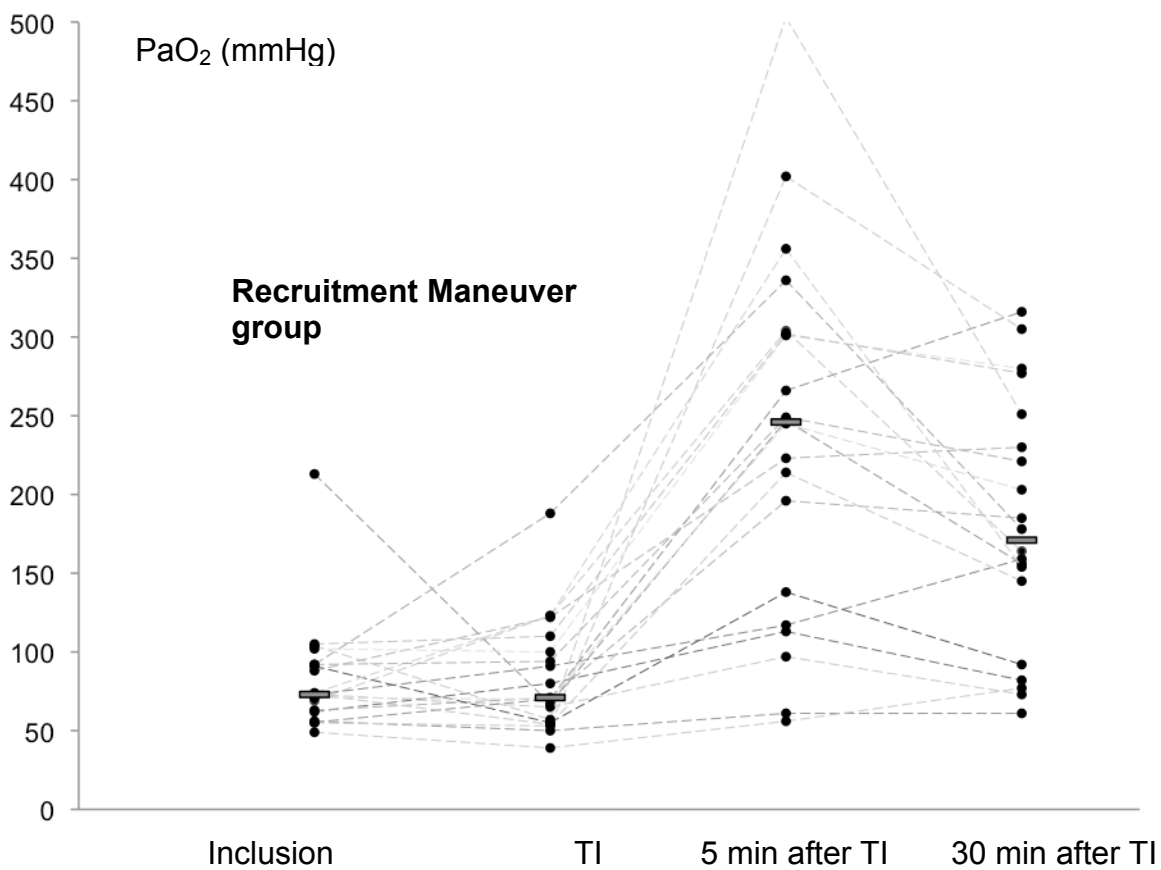

Supplement: MOESM3 [file 9731926]
